# Supplementary material for: Astroglial NF-kB contributes to white matter damage and cognitive impairment in a mouse model of vascular dementia
Source: Springer Nature journal article supplement (doi:10.1186/s40478-016-0350-3), 2016-08-04

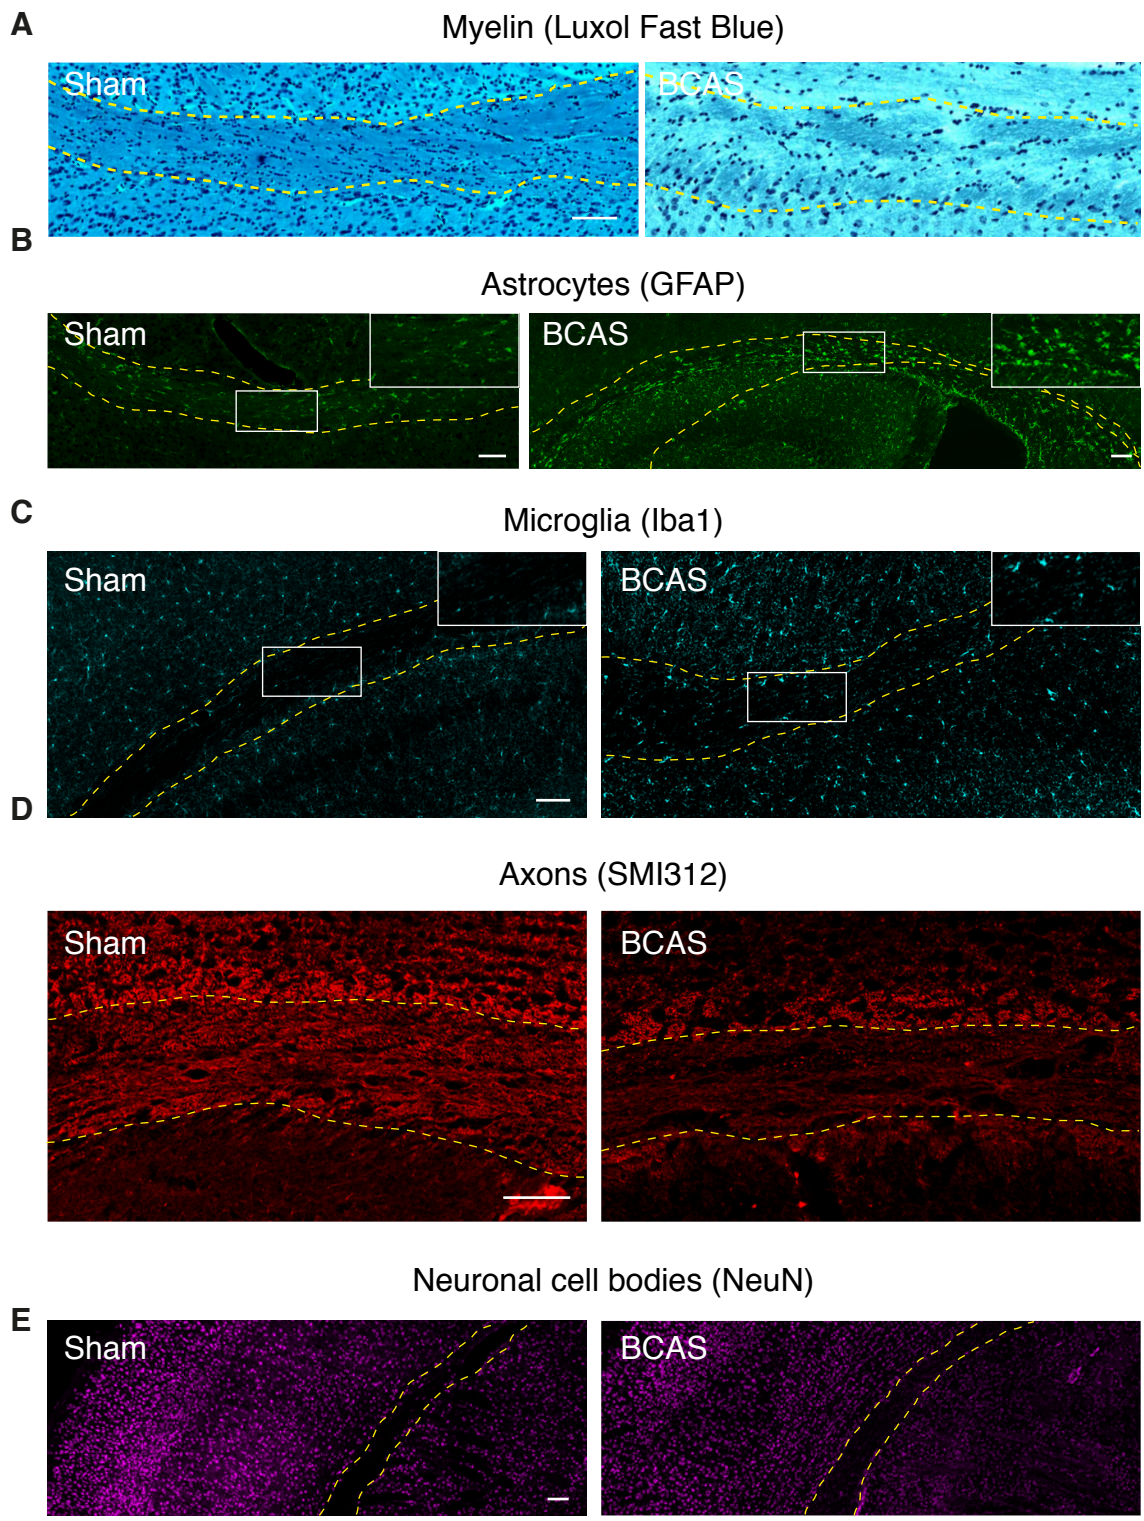

Supplement: MOESM2 [file 25666012]
