# Supplementary material for: Astroglial NF-kB contributes to white matter damage and cognitive impairment in a mouse model of vascular dementia
Source: Springer Nature journal article supplement (doi:10.1186/s40478-016-0350-3), 2016-08-04

-0.22 mm from bregma

-1.06 mm from bregma

WT Sham

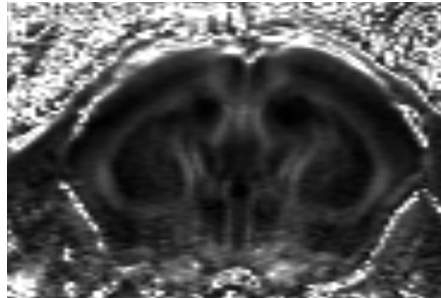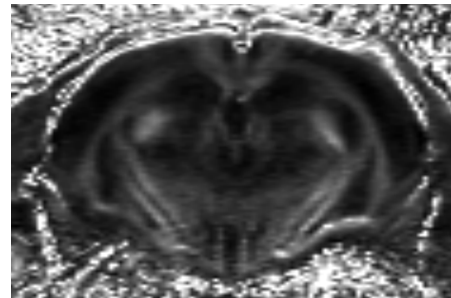

WT BCAS

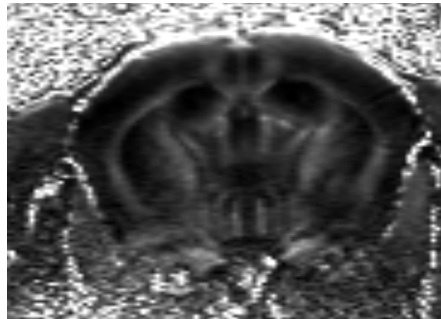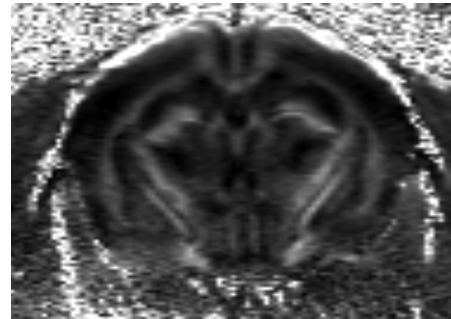

GFAP-I $\kappa$ B $\alpha$ -dn  
Sham

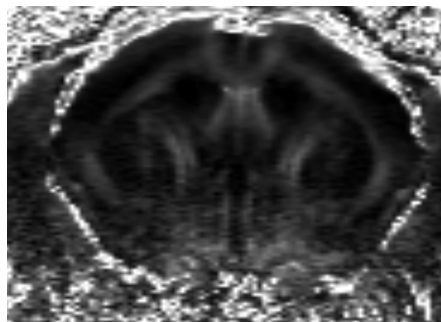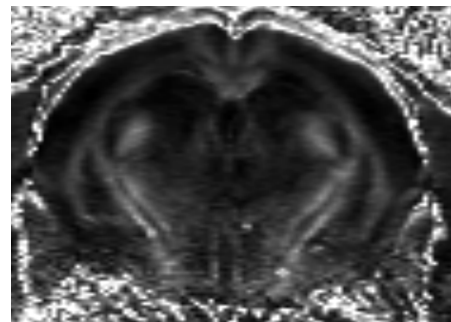

GFAP-I $\kappa$ B $\alpha$ -dn  
BCAS

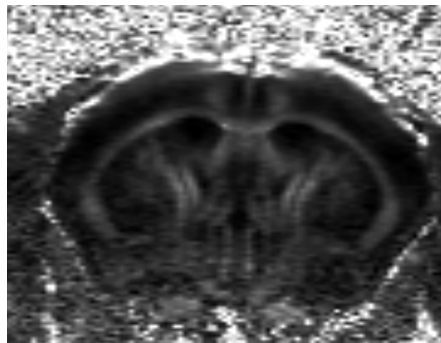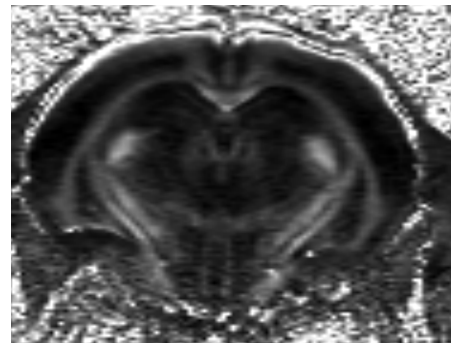

Supplement: MOESM4 [file 25666012]
